# Supplementary material
Source: publisher figshare collection journal article supplement (https://sage.figshare.com/ndownloader/files/12728231)

Online appendix 1- Flow Chart of participants with advanced dementia

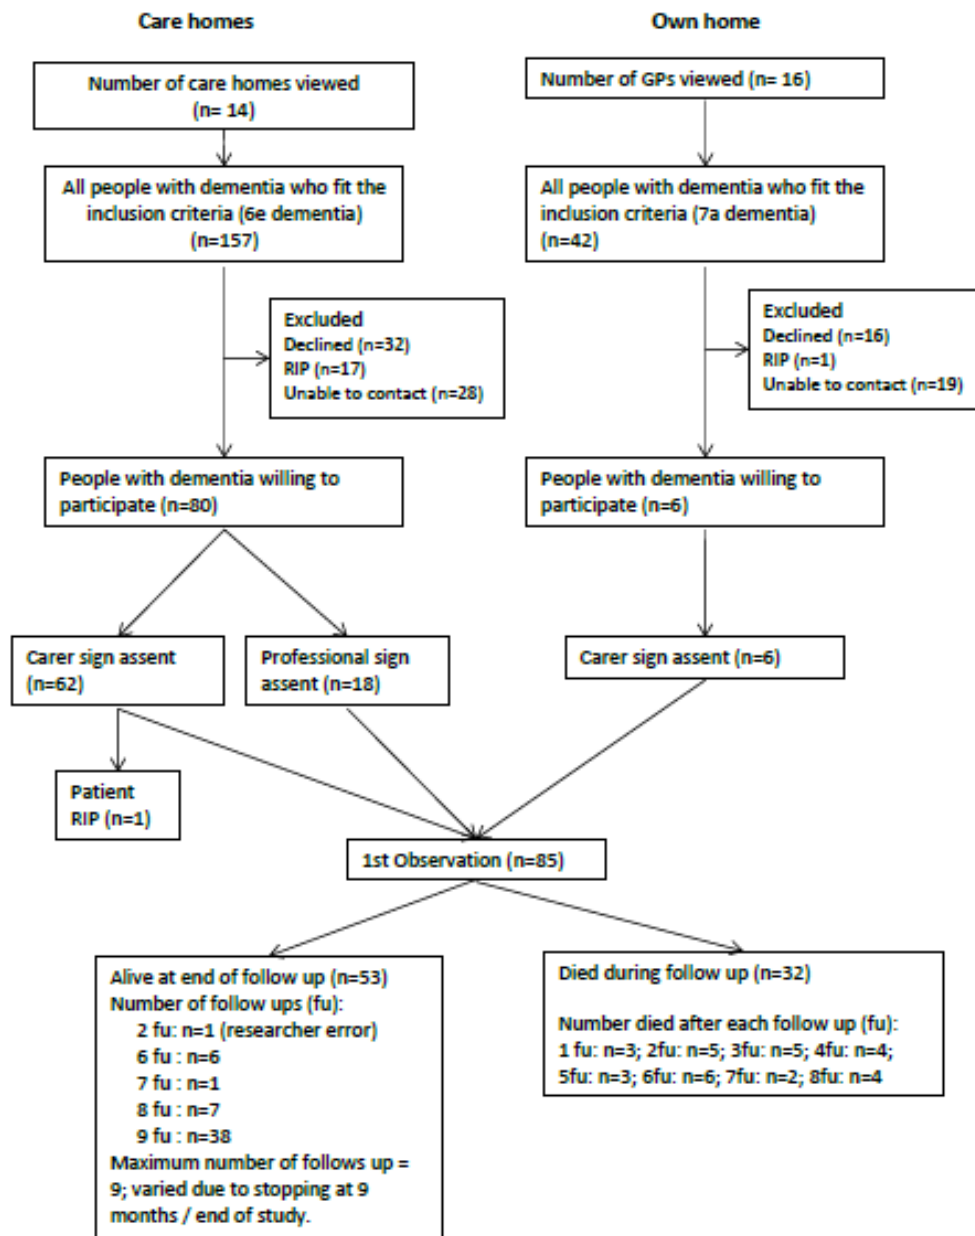

Supplement: Supplementary file 1 [file 12728231]
